# Supplementary material for: Keystone Soil Microbial Modules Associated with Priming Effect under Nitrogen- and Glucose-Addition Treatments
Source: MDPI journal article supplement (doi:10.3390/f14061207), 2023-06-11
Supplement: s1 [file s1]

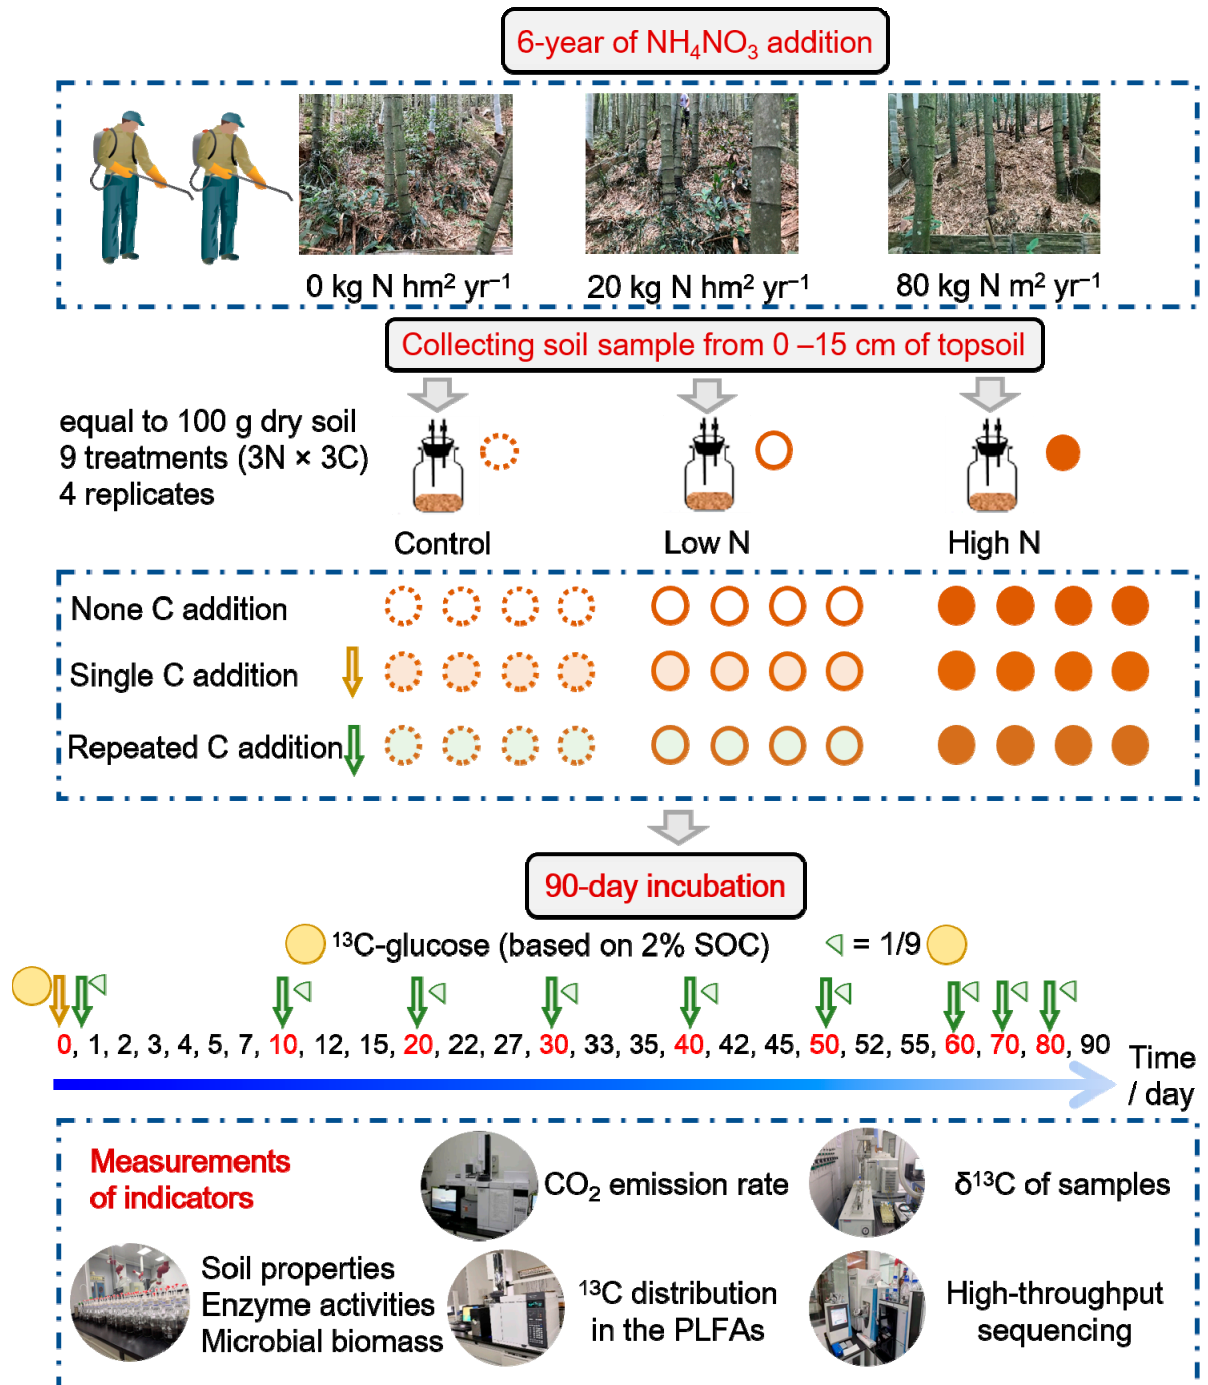

**Figure S1.** Experimental design of the study. The numbers on the timeline indicate soil  $\text{CO}_2$  emission and C isotopic signature ( $\delta^{13}\text{C}$ ) of  $\text{CO}_2$ . Soil and microbial properties were detected after a 90-day incubation period.

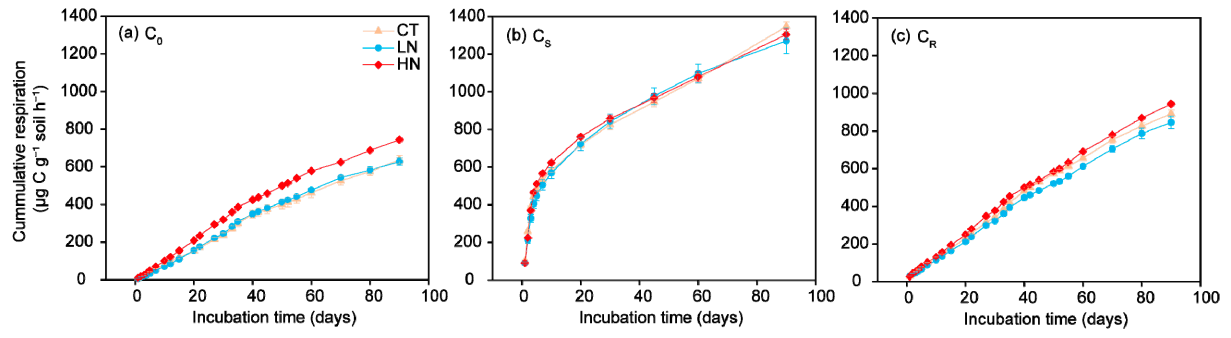

**Figure S2.** Temporal changes in CO<sub>2</sub> emission in different C-addition treatments. **(a)** C<sub>0</sub>, no C addition; **(b)** C<sub>s</sub>, single C addition; **(c)** C<sub>R</sub>, repeated C additions. Abbreviations: CT, control; LN, low-level N addition; HN, high-level N addition.

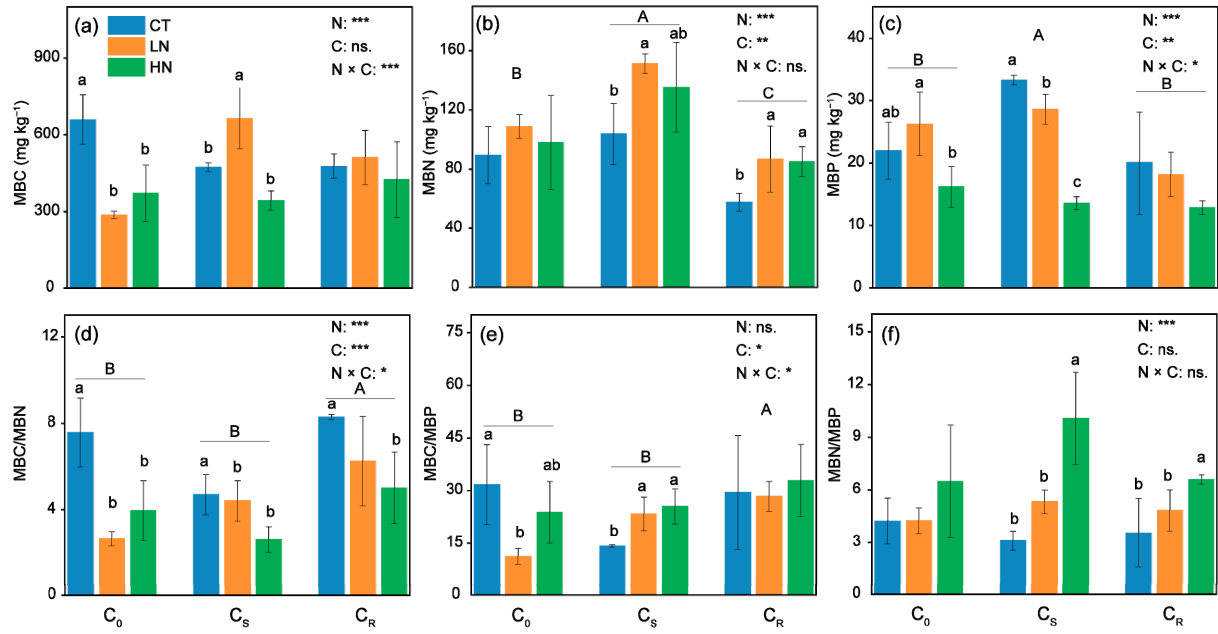

**Figure S3.** C, N, and P concentrations in soil microbial biomass (a–c) and their stoichiometry (d–f). Two-way analysis of variance (ANOVA) was used to determine the effect of N addition, C addition mode, and the interaction ( $N \times C$ ) between N- and C-addition treatments. Asterisks (\*) indicate a significant difference (\* $p < 0.05$ , \*\* $p < 0.01$ , \*\*\* $p < 0.001$ , ns.  $p > 0.05$ ). Different lower-case and upper-case letters indicate significant differences among N- and C-addition treatments, respectively. Abbreviations: MBC, microbial biomass C; MBN, microbial biomass N; MBP, microbial biomass phosphorus; C<sub>0</sub>, no C addition; C<sub>s</sub>, single C addition; C<sub>R</sub>, repeated C additions; CT, control; LN, low-level N addition; HN, high-level N addition.

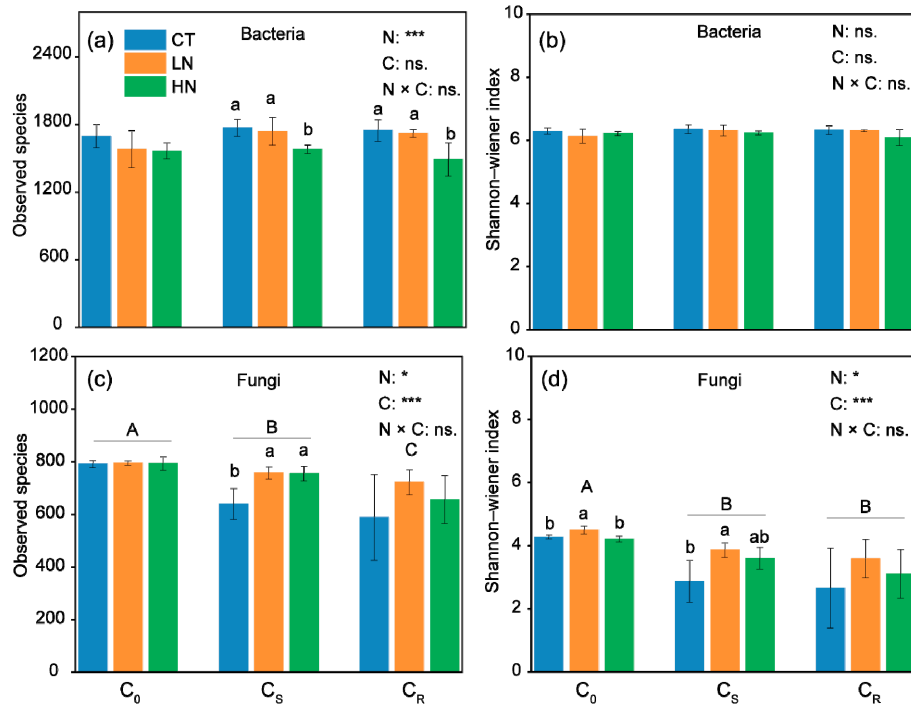

**Figure S4.** Diversity of soil microbial community. (a)–(b) and (c)–(d) indicate the observed species and Shannon–Wiener index of bacteria and fungi, respectively. Two-way analysis of variance (ANOVA) was used to determine the effect of N addition, C addition mode, and the interaction ( $N \times C$ ) between N- and C-addition treatments. Asterisks (\*) indicate a significant difference (\* $p < 0.05$ , \*\* $p < 0.01$ , \*\*\* $p < 0.001$ , ns.  $p > 0.05$ ). Different lower-case and upper-case letters indicate significant differences among N- and C-addition treatments, respectively. Abbreviations: C<sub>0</sub>, no C addition; C<sub>S</sub>, single C addition; C<sub>R</sub>, repeated C additions; CT, control; LN, low-level N addition; HN, high-level N addition.

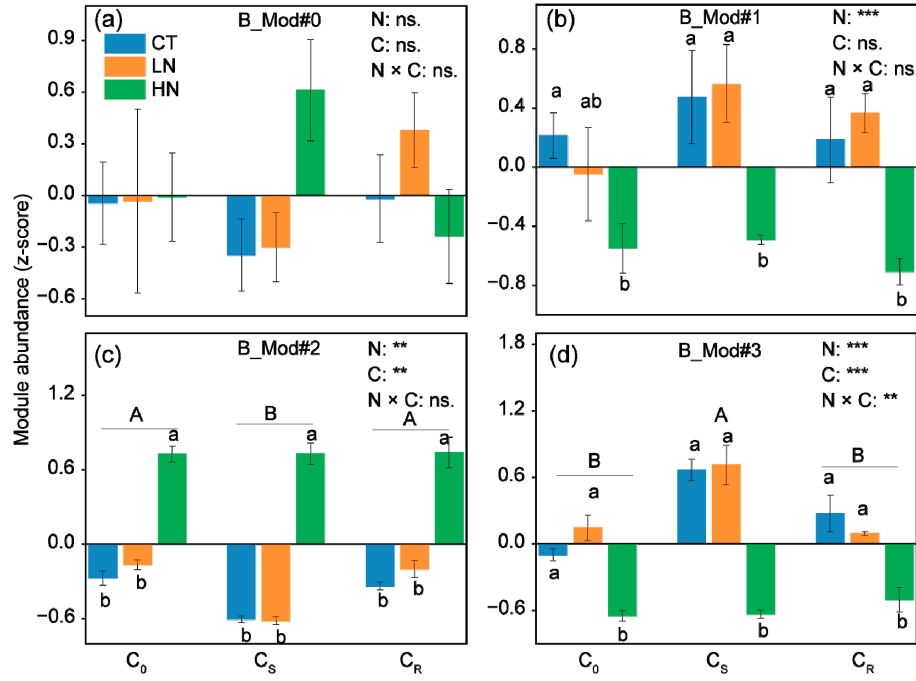

**Figure S5.** Relative abundance of the bacterial modules in different treatments. Two-way analysis of variance (ANOVA) was used to determine the effect of N addition, C-addition mode, and the interaction ( $N \times C$ ) between N- and C-addition treatments. Asterisks (\*) indicate a significant difference ( $**p < 0.01$ ,  $***p < 0.001$ , ns.  $p > 0.05$ ). B\_Mod#0–3 were the major bacterial modules (a–d). Different lower-case and upper-case letters indicate significant differences among N- and C-addition treatments, respectively. Abbreviations: C<sub>0</sub>, no C addition; C<sub>S</sub>, single C addition; C<sub>R</sub>, repeated C additions; CT, control; LN, low-level N addition; HN, high-level N addition.

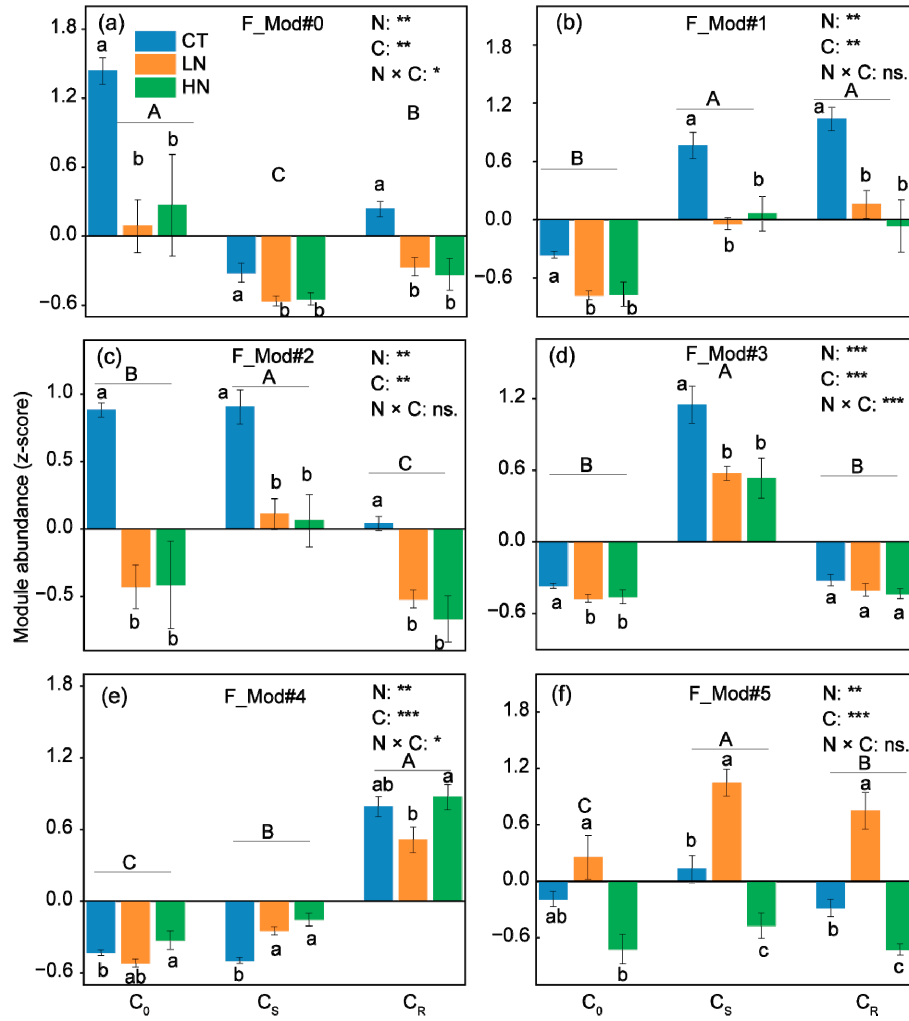

**Figure S6.** Relative abundance of the fungal modules under different treatments. Two-way analysis of variance (ANOVA) was used to determine the effect of N addition, C-addition mode, and the interaction ( $N \times C$ ) between N- and C-addition treatments. Asterisks (\*) indicate a significant difference ( $*p < 0.05$ ,  $**p < 0.01$ ,  $***p < 0.001$ , ns.  $p > 0.05$ ). F\_Mod#0–5 were the major fungal modules (a–f). Different lower-case and upper-case letters indicate significant differences among N- and C-addition treatments, respectively. Abbreviations: C<sub>0</sub>, no C addition; C<sub>s</sub>, single C addition; C<sub>R</sub>, repeated C additions; CT, control; LN, low-level N addition; HN, high-level N addition.

**Table S1** Effect of long-term N addition on physicochemical properties of soil before incubation. Different lowercase letters indicate significant differences between different N-addition treatments. Abbreviations: TC, total carbon; TN, total N; TP, total phosphorus; DOC, dissolved organic carbon; MN, mineral N; AP, available phosphorus; CT, control; LN, low-level N addition; HN, high-level N addition.

| Treatments | pH   | TC<br>(g kg <sup>-1</sup> ) | TN<br>(g kg <sup>-1</sup> ) | TP<br>(g kg <sup>-1</sup> ) | DOC<br>(mg kg <sup>-1</sup> ) | MN<br>(mg kg <sup>-1</sup> ) | AP<br>(mg kg <sup>-1</sup> ) |
|------------|------|-----------------------------|-----------------------------|-----------------------------|-------------------------------|------------------------------|------------------------------|
| CT         | 3.80 | 51.84                       | 4.26                        | 0.82                        | 170.39a                       | 17.90b                       | 8.25a                        |
| LN         | 3.82 | 52.21                       | 4.15                        | 0.80                        | 134.02b                       | 18.44ab                      | 6.06b                        |
| HN         | 3.76 | 53.52                       | 4.45                        | 0.81                        | 176.28a                       | 25.14a                       | 5.89b                        |

**Table S2** Correlation coefficients between the relative abundances of dominant bacterial and fungal taxa at the phylum level and cumulative priming effect. \*  $p < 0.05$ ; numbers are partial correlation coefficients (r) of Spearman's correlation.

| Dominant Phyla |                   | Under different N addition<br>gradients |          | Under different C addition<br>modes |          |
|----------------|-------------------|-----------------------------------------|----------|-------------------------------------|----------|
|                |                   | r                                       | <i>p</i> | r                                   | <i>p</i> |
| Bacteria       | Actinobacteria    | −0.40                                   |          | −0.41                               |          |
|                | Bacteroidetes     | −0.39                                   |          | −0.31                               |          |
|                | Chloroflexi       | −0.41                                   |          | −0.16                               |          |
|                | Firmicutes        | −0.12                                   |          | 0.06                                |          |
|                | Planctomycetes    | 0.25                                    |          | 0.06                                |          |
|                | Proteobacteria    | 0.51                                    | *        | 0.43                                | *        |
|                | Verrucomicrobia   | −0.03                                   |          | −0.07                               |          |
|                | Unassigned        | 0.23                                    |          | 0.03                                |          |
| Fungi          | Ascomycota        | −0.37                                   |          | 0.20                                |          |
|                | Basidiomycota     | 0.39                                    |          | −0.10                               |          |
|                | Mortierellomycota | −0.10                                   |          | 0.07                                |          |
|                | Rozellomycota     | 0.09                                    |          | 0.22                                |          |
|                | Unassigned        | −0.40                                   |          | −0.08                               |          |



**Table S3** Correlations between the relative abundances of dominant bacterial and fungal modules and cumulative priming effect (PE). Mixed linear-model regressions were used to analyze to the relationship between cumulative PE and bacterial and fungal dominant modules under different N-addition addition treatments or C-addition modes, whereby variance of one treatment was eliminated by selecting either N- or C-addition treatment as a random factor. B\_Mod#0, B\_Mod#1, B\_Mod#2, B\_Mod#3, and B\_Mod#4 were the key bacterial modules; F\_Mod#0, F\_Mod#1, F\_Mod#2, F\_Mod#3, F\_Mod#4, and F\_Mod#5 were the key fungal modules. *p* values represent significant levels; *F* values represent the proportion of total variance explained for the dependent variable of cumulative PE. Microbial ecological modules significantly related to PE are indicated in bold text.

| Under different<br>N addition treatments | <i>F</i>      | <i>p</i>     | Under different<br>C addition modes | <i>F</i>      | <i>p</i>          |
|------------------------------------------|---------------|--------------|-------------------------------------|---------------|-------------------|
| B_Mod#0                                  | 3.211         | 0.088        | B_Mod#0                             | 0.73          | 0.402             |
| <b>B_Mod#1</b>                           | <b>6.507</b>  | <b>0.019</b> | B_Mod#1                             | 3.115         | 0.091             |
| B_Mod#2                                  | 11.21         | 0.003        | B_Mod#2                             | 4.231         | 0.052             |
| <b>B_Mod#3</b>                           | <b>14.093</b> | <b>0.001</b> | <b>B_Mod#3</b>                      | <b>6.353</b>  | <b>0.019</b>      |
| F_Mod#0                                  | 0.133         | 0.7195       | F_Mod#0                             | 0.003         | 0.955             |
| <b>F_Mod#1</b>                           | <b>4.554</b>  | <b>0.045</b> | F_Mod#1                             | 0.346         | 0.563             |
| F_Mod#2                                  | 0.313         | 0.582        | F_Mod#2                             | 0.266         | 0.612             |
| F_Mod#3                                  | 0.012         | 0.913        | F_Mod#3                             | 0.017         | 0.897             |
| <b>F_Mod#4</b>                           | <b>6.495</b>  | <b>0.019</b> | F_Mod#4                             | 3.536         | 0.073             |
| F_Mod#5                                  | 0.14          | 0.712        | <b>F_Mod#5</b>                      | <b>61.053</b> | <b>&lt; 0.001</b> |

**Table S4** Effects of long-term nitrogen (N) addition and carbon (C) addition mode on bacteria and fungi in different phylogenetic levels (%).

| Taxonomy                     | C <sub>0</sub> |       |       | C <sub>S</sub> |       |       | C <sub>R</sub> |       |       | Two-way ANOVA analysis |     |       | Among group |          |           | Among group    |                |                |
|------------------------------|----------------|-------|-------|----------------|-------|-------|----------------|-------|-------|------------------------|-----|-------|-------------|----------|-----------|----------------|----------------|----------------|
|                              | CT             | LN    | HN    | CT             | LN    | HN    | CT             | LN    | HN    | N                      | C   | N × C | CT          | LN       | HN        | C <sub>0</sub> | C <sub>S</sub> | C <sub>R</sub> |
| <b>Bacteria_Phylum-level</b> |                |       |       |                |       |       |                |       |       |                        |     |       |             |          |           |                |                |                |
| Actinobacteria               | 25.93          | 27.65 | 31.08 | 23.75          | 23.25 | 29.70 | 26.68          | 26.15 | 33.68 | *                      | *** | ns.   | <b>a</b>    | <b>b</b> | <b>a</b>  | <b>B</b>       | <b>B</b>       | <b>A</b>       |
| Bacteroidetes                | 0.29           | 0.48  | 2.29  | 0.19           | 0.31  | 2.24  | 0.52           | 0.55  | 3.88  | *                      | *** | ns.   | <b>b</b>    | <b>b</b> | <b>a</b>  | <b>B</b>       | <b>B</b>       | <b>A</b>       |
| Chloroflexi                  | 7.27           | 5.57  | 8.72  | 5.07           | 4.89  | 8.90  | 6.03           | 7.82  | 6.09  | ns.                    | ns. | ns.   | a           | a        | a         | A              | A              | A              |
| Firmicutes                   | 19.55          | 18.25 | 20.90 | 16.35          | 17.70 | 20.00 | 17.38          | 18.53 | 17.25 | ns.                    | ns. | ns.   | a           | a        | a         | A              | A              | A              |
| Planctomycetes               | 1.24           | 0.97  | 0.94  | 1.26           | 1.32  | 1.06  | 1.30           | 1.58  | 0.66  | ns.                    | ns. | ns.   | a           | a        | a         | A              | A              | A              |
| Proteobacteria               | 40.55          | 42.15 | 31.53 | 47.98          | 47.15 | 33.30 | 42.65          | 39.05 | 34.95 | *                      | *** | ns.   | <b>ab</b>   | <b>a</b> | <b>b</b>  | <b>A</b>       | <b>A</b>       | <b>B</b>       |
| Verrucomicrobia              | 0.82           | 1.09  | 0.79  | 0.92           | 1.08  | 1.20  | 1.38           | 1.25  | 0.62  | ns.                    | ns. | ns.   | a           | a        | a         | A              | A              | A              |
| Unassigned                   | 3.62           | 3.14  | 3.21  | 3.56           | 3.33  | 3.02  | 3.25           | 4.16  | 2.50  | ns.                    | ns. | ns.   | a           | a        | a         | A              | A              | A              |
| Others                       | 0.74           | 0.70  | 0.54  | 0.94           | 0.97  | 0.58  | 0.83           | 0.92  | 0.38  | *                      | *** | ns.   | <b>b</b>    | <b>a</b> | <b>ab</b> | <b>A</b>       | <b>A</b>       | <b>B</b>       |
| <b>Bacteria_Genus-level</b>  |                |       |       |                |       |       |                |       |       |                        |     |       |             |          |           |                |                |                |
| Acidiferrimicrobium          | 1.01           | 1.20  | 1.26  | 1.02           | 1.04  | 1.04  | 0.91           | 1.05  | 1.18  | ns.                    | ns. | ns.   | a           | a        | a         | A              | A              | A              |
| Actinoallomurus              | 1.36           | 1.43  | 1.80  | 1.11           | 1.06  | 1.62  | 1.36           | 1.23  | 1.81  | *                      | *** | ns.   | <b>a</b>    | <b>b</b> | <b>ab</b> | <b>B</b>       | <b>B</b>       | <b>A</b>       |
| Actinocorallia               | 1.30           | 1.36  | 1.88  | 1.20           | 1.24  | 1.95  | 1.52           | 1.35  | 2.06  | ns.                    | *** | ns.   | a           | a        | a         | <b>B</b>       | <b>B</b>       | <b>A</b>       |
| Actinomadura                 | 7.65           | 8.65  | 9.76  | 5.95           | 5.88  | 8.71  | 7.92           | 7.77  | 11.29 | ***                    | **  | ns.   | <b>a</b>    | <b>b</b> | <b>a</b>  | <b>B</b>       | <b>B</b>       | <b>A</b>       |
| Aliidongia                   | 5.16           | 5.59  | 3.38  | 6.03           | 5.69  | 3.47  | 4.60           | 4.88  | 3.68  | ns.                    | *** | ns.   | <b>a</b>    | <b>a</b> | <b>a</b>  | <b>A</b>       | <b>A</b>       | <b>B</b>       |
| Azospirillum                 | 1.48           | 1.56  | 1.43  | 1.36           | 1.45  | 1.33  | 1.42           | 1.17  | 1.47  | ns.                    | ns. | ns.   | a           | a        | a         | A              | A              | A              |
| Bradyrhizobium               | 10.71          | 10.58 | 9.11  | 8.99           | 9.25  | 7.93  | 9.98           | 9.44  | 8.87  | *                      | *   | ns.   | <b>a</b>    | <b>a</b> | <b>b</b>  | <b>A</b>       | <b>B</b>       | <b>AB</b>      |
| Desulfofundulus              | 3.96           | 2.28  | 4.54  | 2.48           | 2.28  | 3.81  | 2.09           | 2.58  | 2.93  | ns.                    | *   | ns.   | a           | a        | a         | <b>AB</b>      | <b>B</b>       | <b>A</b>       |
| Dictyobacter                 | 3.11           | 2.26  | 3.90  | 2.30           | 2.03  | 3.32  | 2.66           | 3.14  | 2.52  | ns.                    | ns. | ns.   | a           | a        | a         | A              | A              | A              |
| Methylopila                  | 2.22           | 2.22  | 1.53  | 2.47           | 2.25  | 1.34  | 2.18           | 2.10  | 1.70  | ns.                    | *** | ns.   | a           | a        | a         | <b>A</b>       | <b>A</b>       | <b>B</b>       |
| Mycobacterium                | 2.67           | 2.84  | 2.86  | 2.63           | 2.59  | 2.58  | 2.82           | 2.78  | 2.93  | ns.                    | ns. | ns.   | a           | a        | a         | A              | A              | A              |
| Rhodoplanes                  | 2.66           | 3.67  | 1.57  | 3.19           | 4.24  | 1.60  | 2.73           | 3.31  | 1.50  | ns.                    | *** | ns.   | a           | a        | a         | B              | A              | C              |

|                             |       |       |       |       |       |       |       |       |       |     |     |     |   |    |    |   |   |    |
|-----------------------------|-------|-------|-------|-------|-------|-------|-------|-------|-------|-----|-----|-----|---|----|----|---|---|----|
| Skermanella                 | 1.62  | 1.56  | 1.02  | 1.77  | 1.54  | 0.91  | 1.47  | 1.15  | 1.01  | ns. | *** | ns. | a | a  | a  | A | A | B  |
| Thermosporothrix            | 3.97  | 3.12  | 4.57  | 2.54  | 2.65  | 5.46  | 3.17  | 4.54  | 3.43  | ns. | ns. | ns. | a | a  | a  | A | A | A  |
| Unassigned                  | 28.95 | 27.90 | 28.53 | 28.98 | 29.25 | 27.23 | 29.43 | 29.83 | 27.13 | ns. | ns. | ns. | a | a  | a  | A | A | A  |
| Others                      | 23.17 | 23.82 | 23.14 | 27.00 | 26.72 | 27.72 | 25.76 | 22.94 | 25.75 | *** | ns. | ns. | c | a  | b  | A | A | A  |
| <b>Bacteria_Order-level</b> |       |       |       |       |       |       |       |       |       |     |     |     |   |    |    |   |   |    |
| Acidimicrobiales            | 1.82  | 1.98  | 2.01  | 1.69  | 1.82  | 1.82  | 1.57  | 1.82  | 1.96  | ns. | ns. | ns. | a | a  | a  | A | A | A  |
| Bacillales                  | 5.01  | 6.04  | 4.8   | 3.78  | 4.63  | 4.61  | 4.11  | 5.14  | 4.29  | *   | *   | ns. | b | a  | ab | A | B | B  |
| Burkholderiales             | 0.42  | 0.5   | 0.19  | 4.16  | 3.88  | 1.05  | 2.9   | 1.25  | 1.32  | **  | *** | *   | a | a  | b  | C | A | B  |
| Chromatiales                | 2.89  | 1.94  | 1.51  | 2.59  | 1.99  | 1.82  | 2.93  | 1.47  | 1.79  | *** | ns. | ns. | a | b  | b  | A | A | A  |
| Clostridiales               | 10.58 | 8.9   | 11.65 | 8.79  | 9.03  | 11.2  | 9.42  | 9     | 9.27  | ns. | ns. | ns. | a | a  | a  | A | A | A  |
| Ktedonobacterales           | 7.09  | 5.42  | 8.49  | 4.85  | 4.72  | 8.78  | 5.84  | 7.69  | 5.96  | ns. | ns. | ns. | a | a  | a  | A | A | A  |
| Mycobacteriales             | 2.79  | 2.91  | 2.91  | 2.79  | 2.75  | 2.65  | 2.95  | 2.9   | 2.99  | ns. | ns. | ns. | a | a  | a  | A | A | A  |
| Myxococcales                | 2.06  | 1.7   | 1.49  | 2.54  | 2.47  | 1.46  | 2.08  | 2.45  | 1.1   | *** | ns. | ns. | a | a  | b  | A | A | A  |
| Planctomycetales            | 1.23  | 0.97  | 0.94  | 1.25  | 1.32  | 1.06  | 1.3   | 1.58  | 0.66  | ns. | ns. | ns. | a | a  | a  | A | A | A  |
| Rhizobiales                 | 17.83 | 20.28 | 14.48 | 19.78 | 20.78 | 13.05 | 18.75 | 19.13 | 15.5  | *** | ns. | ns. | a | a  | b  | A | A | A  |
| Rhodospirillales            | 11.75 | 12.1  | 8.56  | 12.98 | 11.98 | 8.52  | 10.54 | 9.84  | 9.06  | **  | ns. | ns. | a | a  | b  | A | A | A  |
| Solirubrobacterales         | 2.51  | 2.96  | 2.96  | 2.48  | 2.5   | 2.85  | 2.36  | 2.65  | 3.31  | *   | ns. | ns. | b | ab | a  | A | A | A  |
| Streptosporangiales         | 12.73 | 14.33 | 16.58 | 10.16 | 10.17 | 15.1  | 13.25 | 13.13 | 18.75 | *** | **  | ns. | b | b  | a  | A | B | A  |
| Unassigned                  | 10.92 | 9.48  | 10.42 | 11.22 | 10.78 | 9.72  | 10.47 | 11.9  | 8.7   | ns. | ns. | ns. | a | a  | a  | A | A | A  |
| Xanthomonadales             | 0.61  | 1.71  | 1.01  | 0.62  | 1.45  | 3.23  | 0.48  | 0.82  | 2.04  | *** | *   | **  | c | b  | a  | B | A | B  |
| Others                      | 9.79  | 8.79  | 12.01 | 10.34 | 9.74  | 13.09 | 11.06 | 9.27  | 13.33 | *** | ns. | ns. | b | c  | a  | A | A | A  |
| <b>Fungi_Phylum-level</b>   |       |       |       |       |       |       |       |       |       |     |     |     |   |    |    |   |   |    |
| Ascomycota                  | 45.00 | 45.33 | 43.35 | 24.13 | 38.95 | 36.43 | 23.66 | 32.83 | 30.05 | *** | *   | ns. | a | b  | b  | B | A | A  |
| Basidiomycota               | 16.25 | 16.80 | 16.78 | 59.00 | 37.75 | 41.05 | 59.85 | 41.33 | 48.28 | *** | *   | ns. | b | a  | a  | A | B | AB |
| Mortierellomycota           | 21.78 | 15.18 | 11.73 | 8.40  | 9.83  | 7.31  | 8.79  | 9.79  | 5.25  | *** | *** | ns. | a | b  | b  | C | B | A  |
| Rozellomycota               | 2.72  | 4.05  | 1.66  | 0.98  | 2.31  | 0.84  | 1.19  | 2.60  | 0.94  | *** | *** | ns. | a | b  | b  | B | A | B  |
| Unassigned                  | 14.00 | 18.43 | 26.23 | 7.36  | 10.99 | 14.23 | 6.43  | 13.28 | 15.41 | *** | *** | ns. | a | b  | b  | A | A | B  |
| Others                      | 0.26  | 0.22  | 0.27  | 0.13  | 0.17  | 0.15  | 0.08  | 0.18  | 0.08  | **  | ns. | ns. | a | b  | b  | A | A | A  |

### Fungi\_Order-level

|                       |             |             |             |             |             |             |             |             |             |            |            |            |          |          |           |          |          |          |
|-----------------------|-------------|-------------|-------------|-------------|-------------|-------------|-------------|-------------|-------------|------------|------------|------------|----------|----------|-----------|----------|----------|----------|
| Agaricales            | 1.40        | 4.94        | 2.36        | 0.62        | 2.68        | 1.01        | 0.45        | 2.31        | 0.82        | ***        | ***        | ns.        | <b>b</b> | <b>a</b> | <b>b</b>  | <b>A</b> | <b>B</b> | <b>B</b> |
| Archaeorhizomycetales | 16.48       | 15.25       | 12.75       | 6.68        | 8.93        | 6.40        | 7.65        | 11.56       | 7.92        | ns.        | ***        | ns.        | <b>a</b> | <b>a</b> | <b>a</b>  | <b>A</b> | <b>B</b> | <b>B</b> |
| Chaetothyriales       | 0.78        | 1.47        | 0.83        | 1.18        | 2.95        | 2.60        | 1.41        | 2.47        | 2.54        | ***        | ***        | ns.        | <b>b</b> | <b>a</b> | <b>a</b>  | <b>B</b> | <b>A</b> | <b>A</b> |
| Filobasidiales        | 1.62        | 1.07        | 1.13        | 5.51        | 6.05        | 5.42        | 4.95        | 3.90        | 3.49        | ns.        | ***        | ns.        | <b>a</b> | <b>a</b> | <b>a</b>  | <b>B</b> | <b>A</b> | <b>C</b> |
| GS11                  | 2.38        | 3.40        | 1.31        | 0.85        | 1.98        | 0.65        | 0.98        | 2.19        | 0.70        | ***        | ***        | ns.        | <b>b</b> | <b>a</b> | <b>c</b>  | <b>A</b> | <b>B</b> | <b>B</b> |
| Helotiales            | 2.92        | 3.65        | 3.69        | 1.29        | 2.45        | 2.82        | 1.42        | 2.32        | 2.23        | ***        | ***        | ns.        | <b>b</b> | <b>a</b> | <b>a</b>  | <b>A</b> | <b>B</b> | <b>B</b> |
| <b>Hypocreales</b>    | <b>2.38</b> | <b>3.89</b> | <b>2.49</b> | <b>3.31</b> | <b>7.02</b> | <b>4.86</b> | <b>1.62</b> | <b>2.88</b> | <b>2.26</b> | <b>***</b> | <b>***</b> | <b>*</b>   | <b>c</b> | <b>a</b> | <b>b</b>  | <b>B</b> | <b>A</b> | <b>B</b> |
| Mortierellales        | 21.78       | 15.18       | 11.73       | 8.40        | 9.83        | 7.31        | 8.79        | 9.79        | 5.25        | **         | ***        | *          | <b>a</b> | <b>a</b> | <b>b</b>  | <b>A</b> | <b>B</b> | <b>B</b> |
| Sebacinales           | 10.88       | 9.04        | 11.05       | 49.00       | 27.43       | 32.20       | 52.60       | 33.95       | 42.63       | *          | ***        | ns.        | <b>a</b> | <b>b</b> | <b>ab</b> | <b>B</b> | <b>A</b> | <b>A</b> |
| Trichosporonales      | 1.78        | 1.19        | 1.51        | 3.60        | 1.17        | 2.11        | 1.64        | 0.84        | 1.12        | ***        | ***        | **         | <b>a</b> | <b>c</b> | <b>b</b>  | <b>B</b> | <b>A</b> | <b>B</b> |
| Unassigned            | 33.45       | 35.40       | 45.55       | 16.53       | 24.45       | 27.68       | 16.14       | 24.38       | 28.18       | **         | ***        | ns.        | <b>b</b> | <b>a</b> | <b>a</b>  | <b>A</b> | <b>B</b> | <b>B</b> |
| <b>Xylariales</b>     | <b>0.71</b> | <b>1.11</b> | <b>1.74</b> | <b>0.88</b> | <b>1.77</b> | <b>3.54</b> | <b>0.49</b> | <b>0.73</b> | <b>0.92</b> | <b>***</b> | <b>***</b> | <b>***</b> | <b>c</b> | <b>b</b> | <b>a</b>  | <b>B</b> | <b>A</b> | <b>C</b> |
| Others                | 3.48        | 4.43        | 3.88        | 2.16        | 3.31        | 3.42        | 1.85        | 2.70        | 1.96        | **         | ***        | ns.        | <b>b</b> | <b>a</b> | <b>a</b>  | <b>A</b> | <b>B</b> | <b>C</b> |

### Fungi\_Genus-level

|                     |             |             |             |             |             |             |             |             |             |            |            |            |          |          |          |           |          |          |
|---------------------|-------------|-------------|-------------|-------------|-------------|-------------|-------------|-------------|-------------|------------|------------|------------|----------|----------|----------|-----------|----------|----------|
| Apiotrichum         | 1.75        | 1.13        | 1.46        | 3.55        | 1.15        | 2.08        | 1.62        | 0.83        | 1.08        | ***        | ***        | ***        | <b>b</b> | <b>a</b> | <b>b</b> | <b>A</b>  | <b>C</b> | <b>B</b> |
| Archaeorhizomyces   | 16.48       | 15.25       | 12.75       | 6.68        | 8.93        | 6.40        | 7.65        | 11.56       | 7.92        | ***        | ns.        | ns.        | <b>a</b> | <b>b</b> | <b>b</b> | <b>A</b>  | <b>A</b> | <b>A</b> |
| Cladophialophora    | 0.35        | 0.49        | 0.41        | 0.74        | 1.54        | 1.73        | 0.95        | 1.58        | 1.98        | ***        | ***        | ns.        | <b>b</b> | <b>a</b> | <b>a</b> | <b>B</b>  | <b>A</b> | <b>A</b> |
| <b>Microdochium</b> | <b>0.61</b> | <b>0.86</b> | <b>1.52</b> | <b>0.83</b> | <b>1.62</b> | <b>3.43</b> | <b>0.45</b> | <b>0.62</b> | <b>0.84</b> | <b>***</b> | <b>***</b> | <b>***</b> | <b>b</b> | <b>a</b> | <b>c</b> | <b>C</b>  | <b>B</b> | <b>A</b> |
| Mortierella         | 21.78       | 15.18       | 11.73       | 8.40        | 9.83        | 7.31        | 8.79        | 9.79        | 5.25        | ***        | ***        | *          | <b>a</b> | <b>b</b> | <b>b</b> | <b>A</b>  | <b>A</b> | <b>B</b> |
| Oidiodendron        | 1.62        | 1.71        | 1.70        | 0.44        | 0.69        | 0.76        | 0.59        | 0.92        | 0.76        | ***        | ns.        | ns.        | <b>a</b> | <b>b</b> | <b>b</b> | <b>A</b>  | <b>A</b> | <b>A</b> |
| <b>Paecilomyces</b> | <b>0.55</b> | <b>1.33</b> | <b>0.56</b> | <b>1.39</b> | <b>3.76</b> | <b>2.30</b> | <b>0.54</b> | <b>1.22</b> | <b>0.66</b> | <b>***</b> | <b>***</b> | <b>**</b>  | <b>b</b> | <b>a</b> | <b>b</b> | <b>B</b>  | <b>A</b> | <b>B</b> |
| Sebacina            | 10.74       | 8.78        | 10.90       | 48.95       | 27.28       | 32.15       | 52.50       | 33.85       | 42.53       | *          | ***        | ns.        | <b>b</b> | <b>a</b> | <b>a</b> | <b>AB</b> | <b>B</b> | <b>A</b> |
| Solicoccozyma       | 1.62        | 1.07        | 1.13        | 5.51        | 6.05        | 5.42        | 4.95        | 3.90        | 3.49        | ***        | ns.        | ns.        | <b>c</b> | <b>a</b> | <b>b</b> | <b>A</b>  | <b>A</b> | <b>A</b> |
| Unassigned          | 40.50       | 47.50       | 52.28       | 20.20       | 32.18       | 32.90       | 19.34       | 31.73       | 32.03       | ***        | ***        | ns.        | <b>a</b> | <b>b</b> | <b>b</b> | <b>B</b>  | <b>A</b> | <b>A</b> |
| others              | 4.01        | 6.71        | 5.58        | 3.31        | 6.98        | 5.53        | 2.62        | 4.01        | 3.47        | ***        | ***        | <b>ns.</b> | <b>a</b> | <b>a</b> | <b>b</b> | <b>C</b>  | <b>A</b> | <b>B</b> |
